# Supplementary material for: Photoreforming of polyester plastics into added-value chemicals coupled with H2 evolution over a Ni2P/ZnIn2S4 catalyst
Source: Royal Society of Chemistry journal article supplement (doi:10.1039/d3qi00914a), 2023-01-01
Supplement: d3qi00914a1.pdf [file d3qi00914a1.pdf]

## Supporting Information

### **Photoreforming of polyester plastics into added-value chemicals coupling with H<sub>2</sub> evolution over a Ni<sub>2</sub>P/ZnIn<sub>2</sub>S<sub>4</sub> catalyst**

Chu-Xuan Liu,<sup>ab</sup> Rui Shi,<sup>a</sup> Wangjing Ma,<sup>a</sup> Fulai Liu<sup>\*a</sup> and Yong Chen <sup>\*ab</sup>

<sup>a</sup>Key Laboratory of Photochemical Conversion and Optoelectronic Materials, CAS-HKU Joint Laboratory on New Materials, Technical Institute of Physics and Chemistry, Chinese Academy of Sciences, CAS, Beijing 100190, P.R. China

<sup>b</sup>University of Chinese Academy of Sciences, Beijing 100049, P.R. China

\*E-mail: chen Yong@mail.ipc.ac.cn; liu fulai@mail.ipc.ac.cn

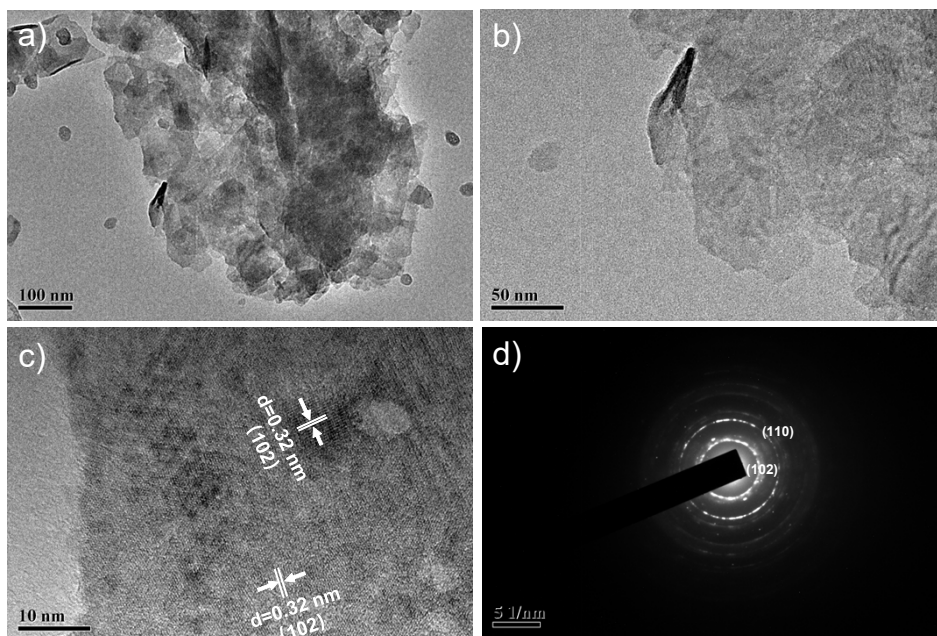

**Fig. S1** a-b) TEM and c) high-resolution TEM images of pristine  $\text{ZnIn}_2\text{S}_4$  nanosheets; d) SAED pattern of pristine  $\text{ZnIn}_2\text{S}_4$  nanosheets.

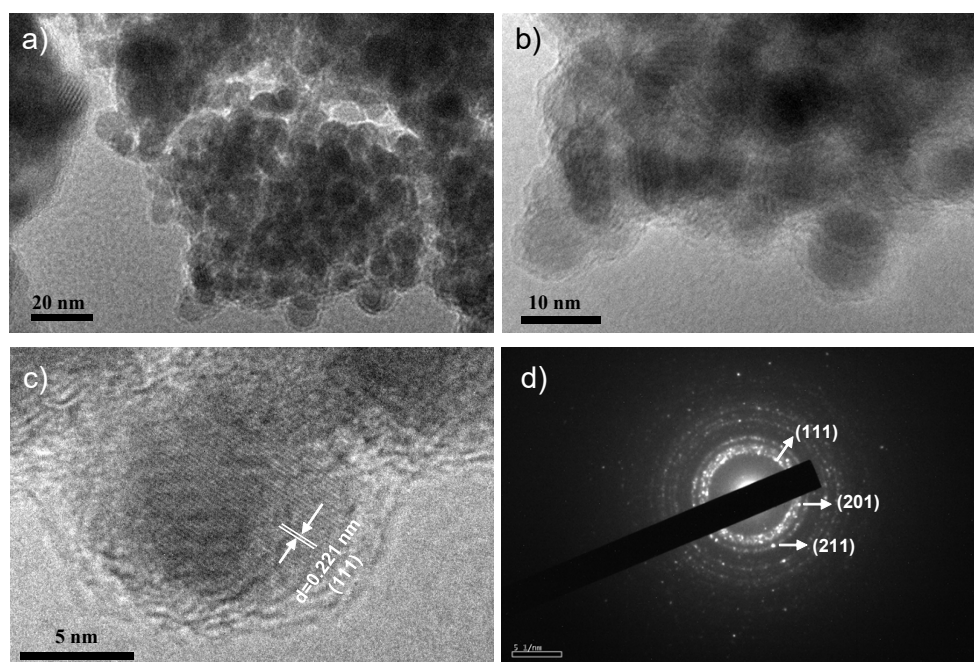

**Fig. S2** a-b) TEM and c) high-resolution TEM images of pure  $\text{Ni}_2\text{P}$  nanoparticles; d) SAED pattern of pure  $\text{Ni}_2\text{P}$  nanoparticles.

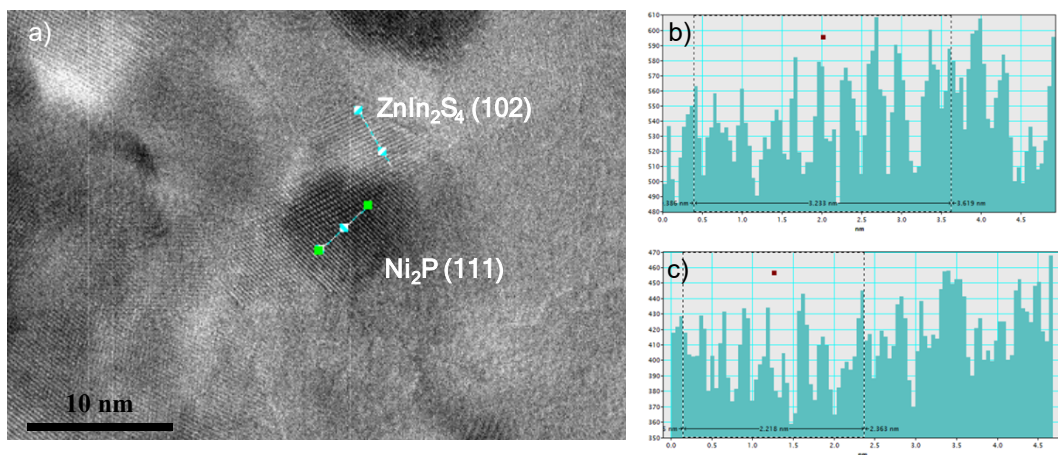

**Fig. S3** a) high-resolution TEM image of Ni<sub>2</sub>P/ZnIn<sub>2</sub>S<sub>4</sub>; b-c) intensity profile of ZnIn<sub>2</sub>S<sub>4</sub> and Ni<sub>2</sub>P crystal face.

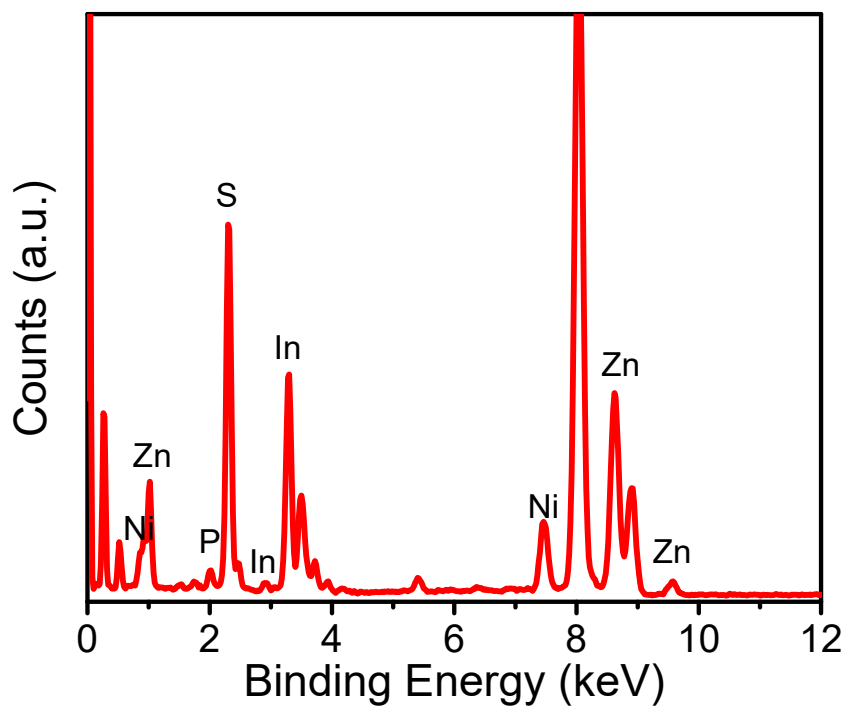

**Fig. S4** EDX spectrum of the Ni<sub>2</sub>P/ZnIn<sub>2</sub>S<sub>4</sub> composites.

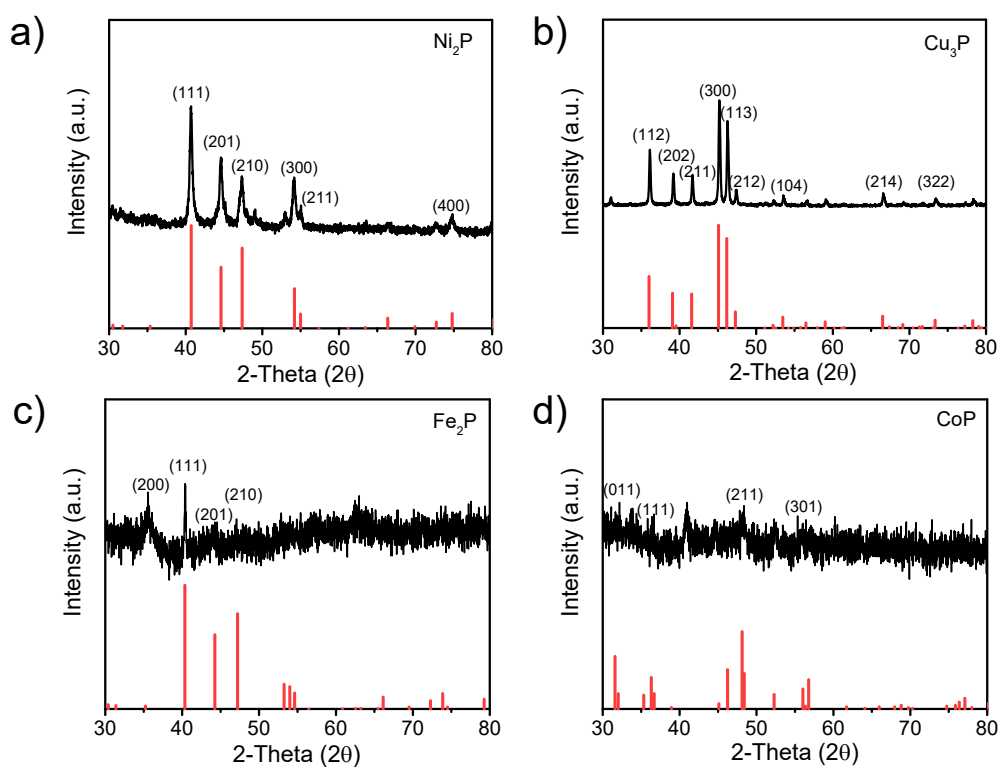

**Fig. S5** The XRD patterns of a)  $\text{Ni}_2\text{P}$ ; b)  $\text{Cu}_3\text{P}$ ; c)  $\text{Fe}_2\text{P}$ ; d)  $\text{CoP}$  samples.

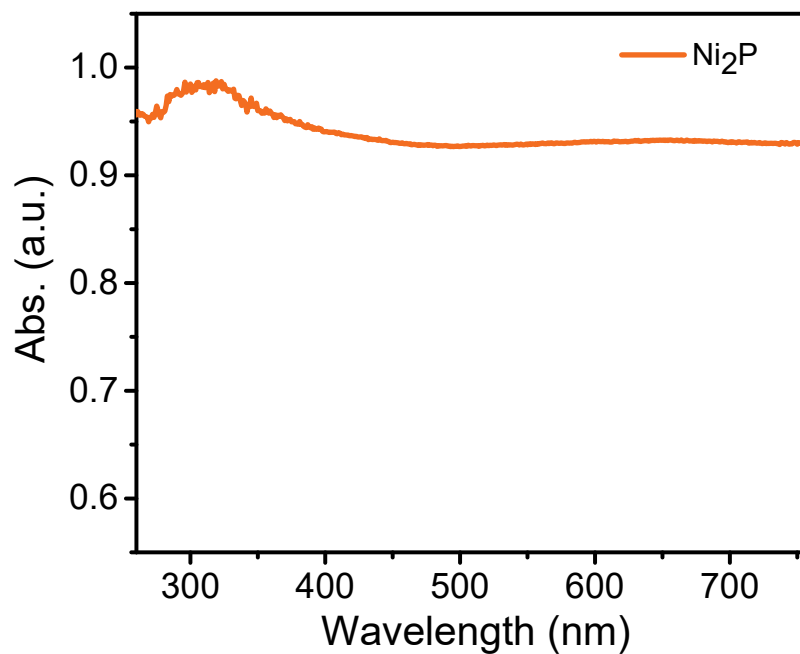

**Fig. S6** UV-vis DRS spectrum of  $\text{Ni}_2\text{P}$  nanoparticles.

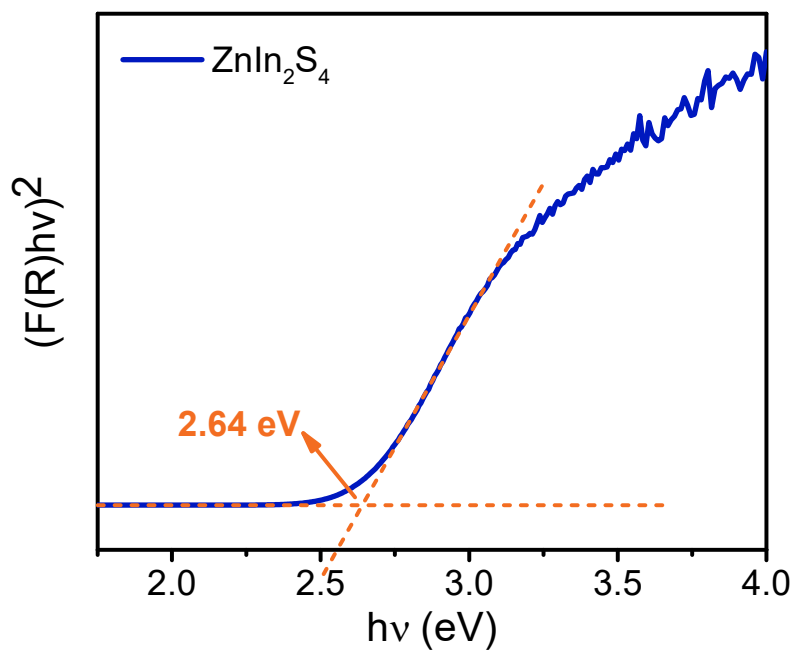

**Fig. S7** Curve of  $(F(R)hv)^2$  versus the energy of the exciting light ( $hv$ ) of  $ZnIn_2S_4$ .

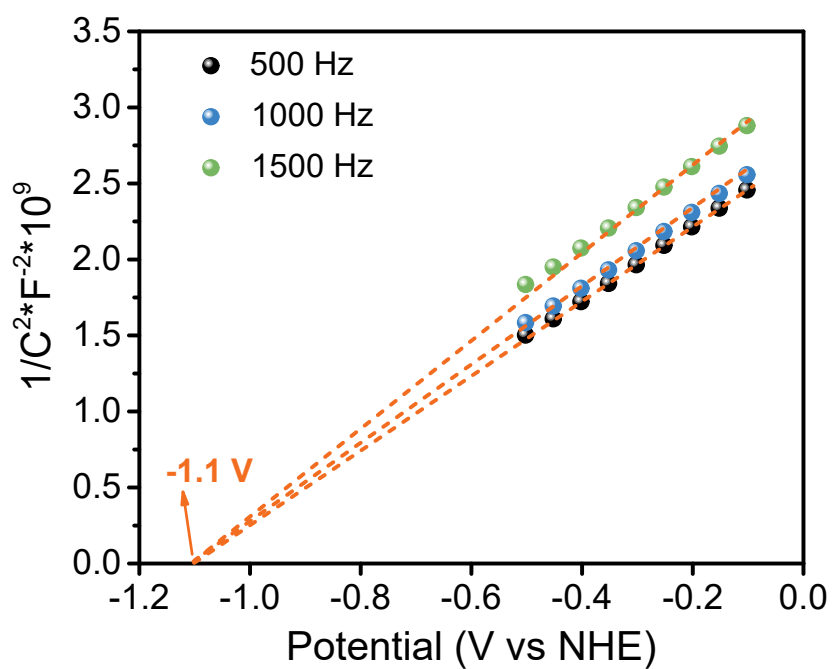

**Fig. S8** Mott-Schottky plots of  $ZnIn_2S_4$ .

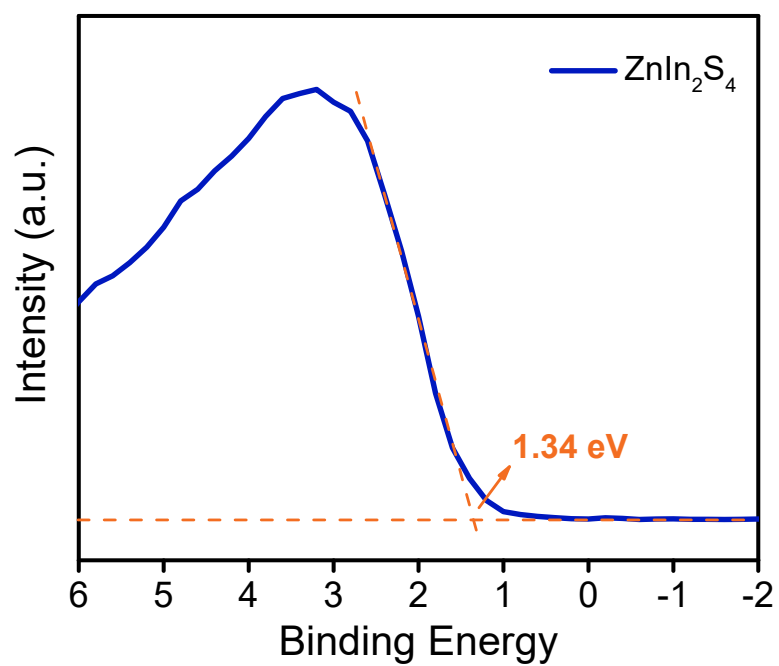

**Fig. S9** The valence band spectrum of ZnIn<sub>2</sub>S<sub>4</sub>.

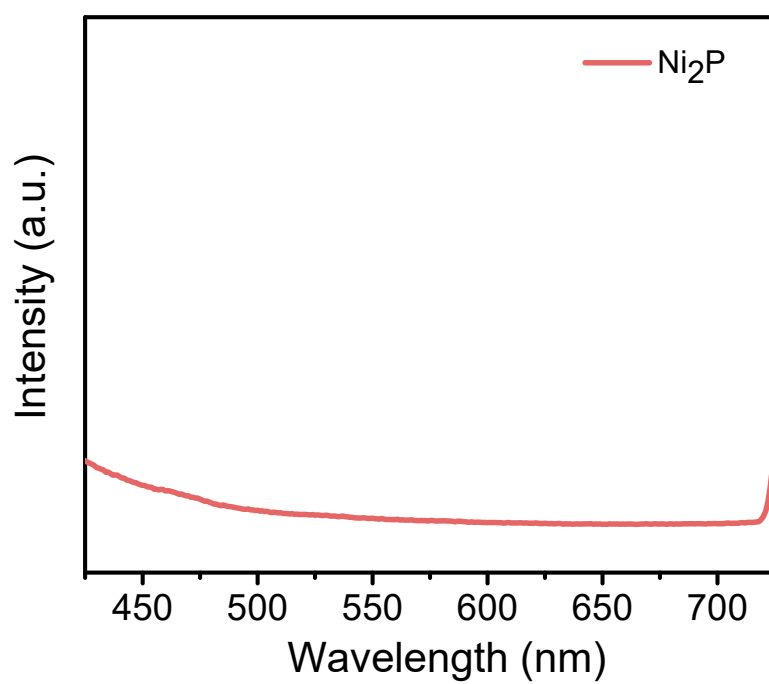

**Fig. S10** PL spectrum of Ni<sub>2</sub>P nanoparticles.

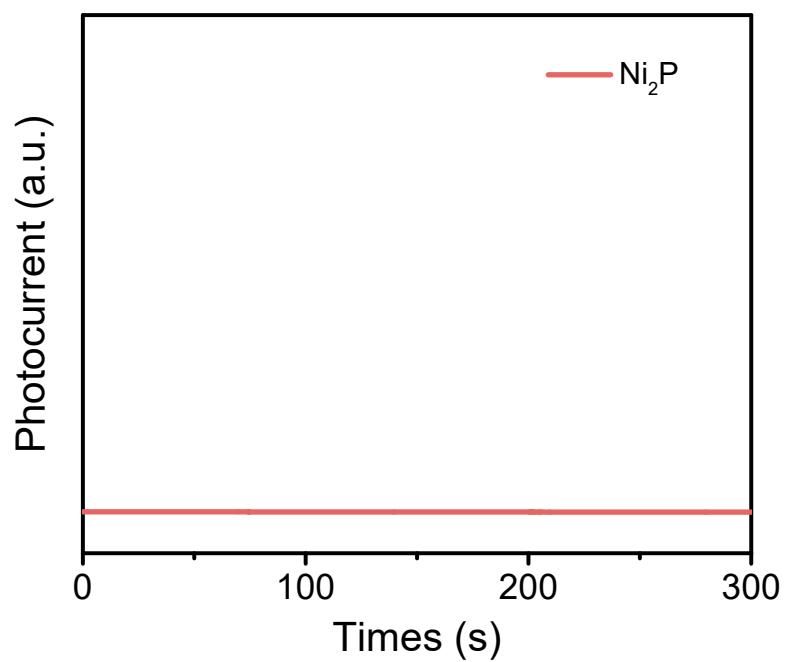

**Fig. S11** The photocurrent response of Ni<sub>2</sub>P nanoparticles.

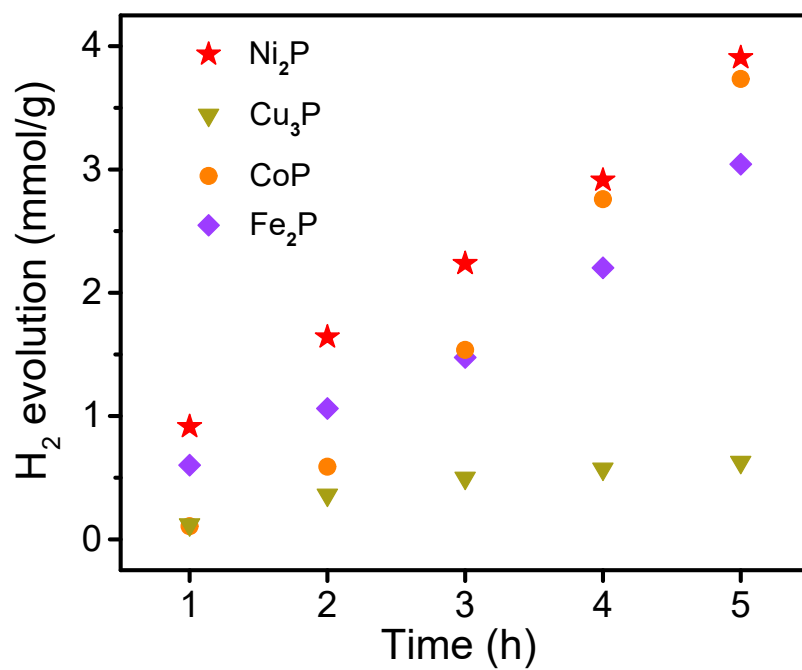

**Fig. S12** Time-dependent H<sub>2</sub> evolution plots of Ni<sub>2</sub>P/ZnIn<sub>2</sub>S<sub>4</sub>, CoP/ZnIn<sub>2</sub>S<sub>4</sub>, Fe<sub>2</sub>P/ZnIn<sub>2</sub>S<sub>4</sub>, Cu<sub>3</sub>P/ZnIn<sub>2</sub>S<sub>4</sub> under visible light irradiation ( $\lambda > 420$  nm) in 0.1 M PLA hydrolysate.

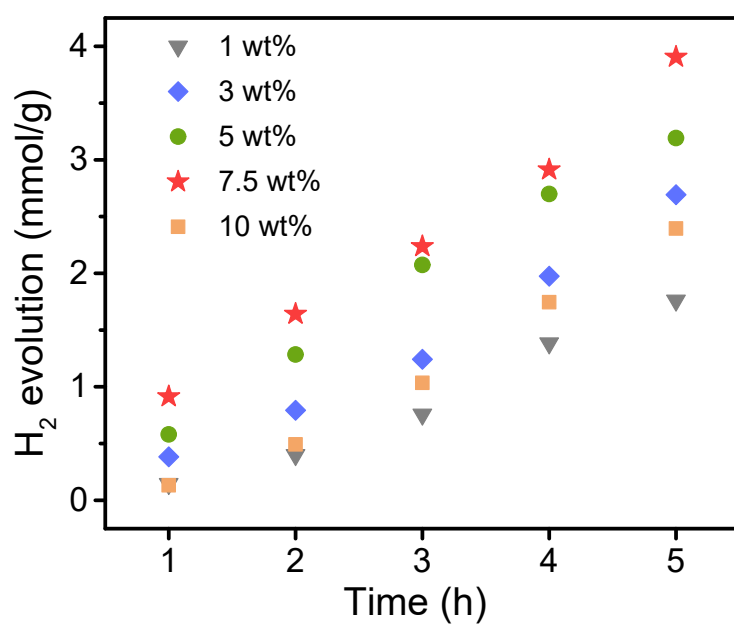

**Fig. S13** Time-dependent H<sub>2</sub> evolution plots of Ni<sub>2</sub>P/ZnIn<sub>2</sub>S<sub>4</sub> with different mass ratio under visible light irradiation ( $\lambda > 420$  nm) in 0.1 M PLA hydrolysate.

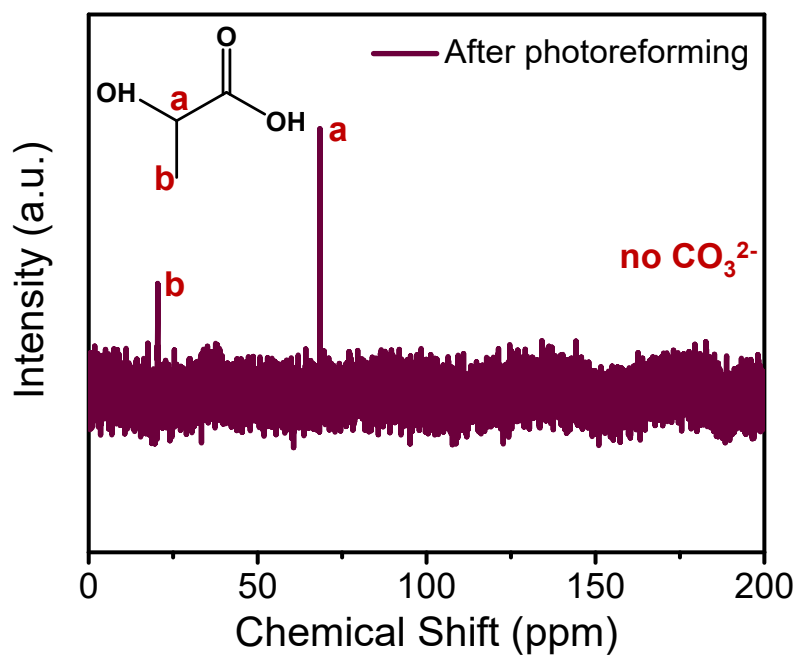

**Fig. S14** <sup>13</sup>C NMR of pretreated PLA after photoreforming for 24h.



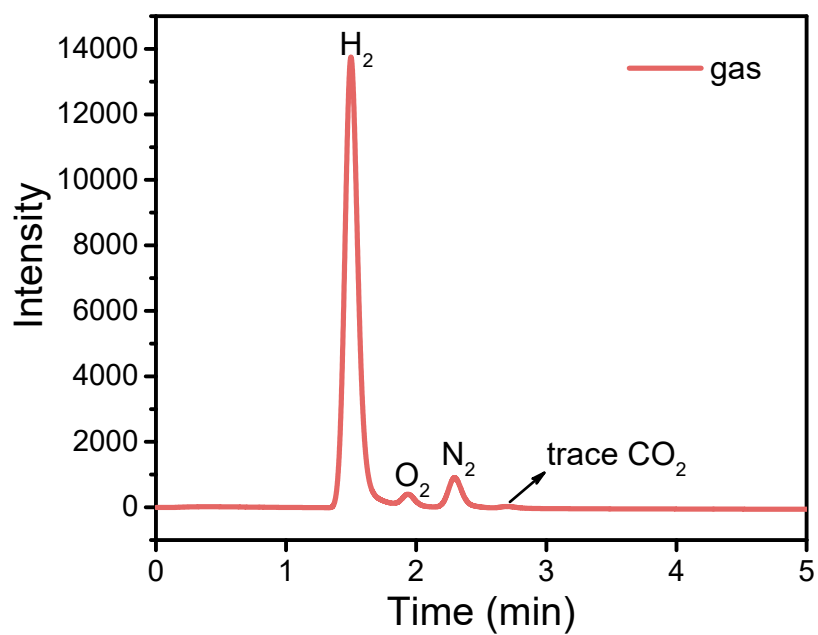

**Fig. S15** GC spectrum of the generated gas after photoreforming.

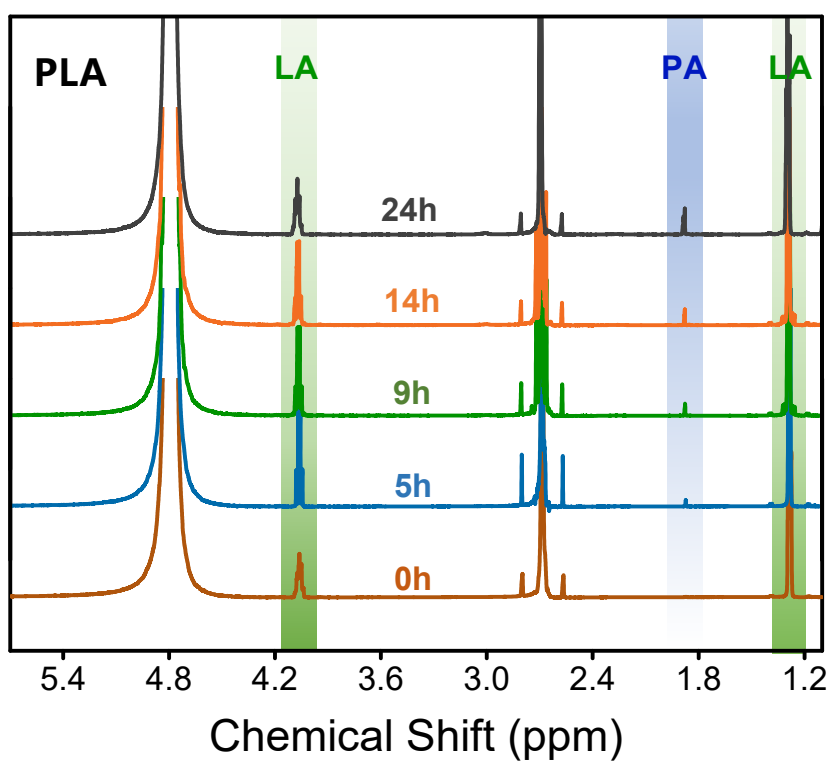

**Fig. S16**  $^1\text{H}$  NMR measurements of PLA oxidation.

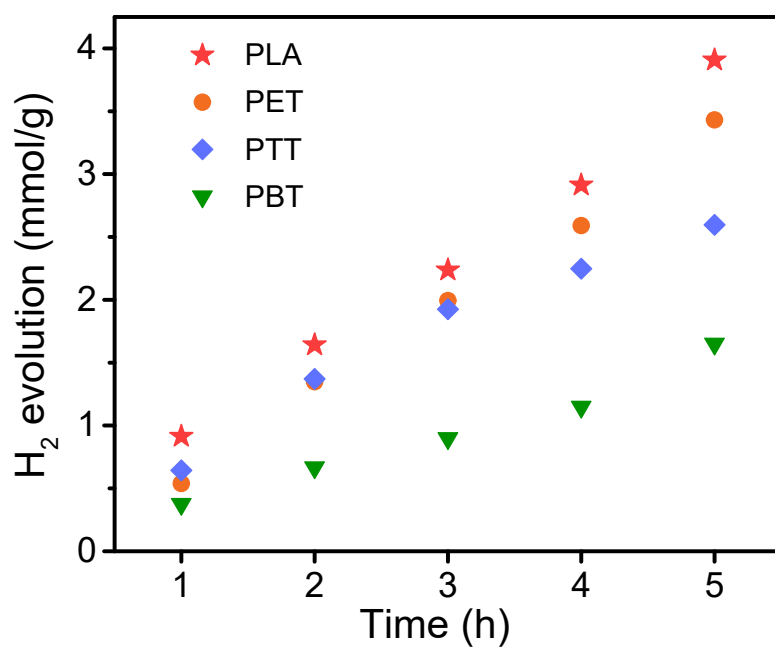

**Fig. S17** Time-dependent H<sub>2</sub> evolution plots of 7.5-Ni<sub>2</sub>P/ZnIn<sub>2</sub>S<sub>4</sub> under visible light irradiation ( $\lambda > 420$  nm) in 0.1 M different plastic hydrolysates.

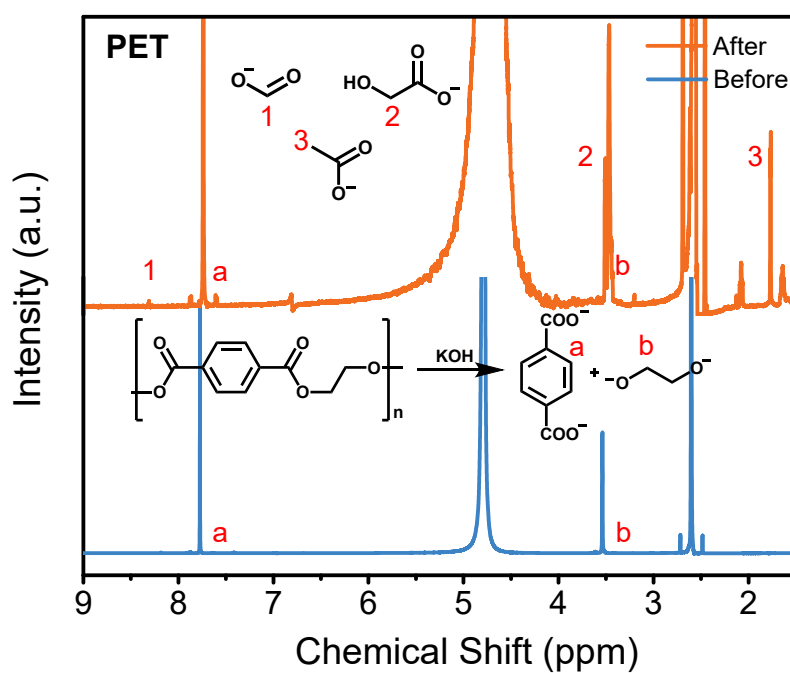

**Fig. S18** <sup>1</sup>H NMR spectra of products before and after photoreforming of PET.

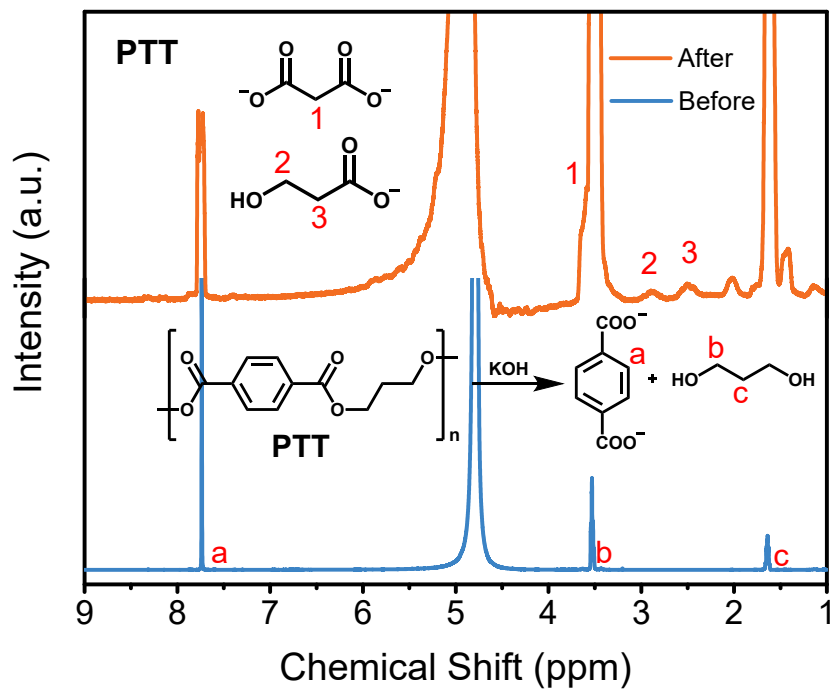

Fig. S19  $^1\text{H}$  NMR spectra of products before and after photoreforming of PTT.

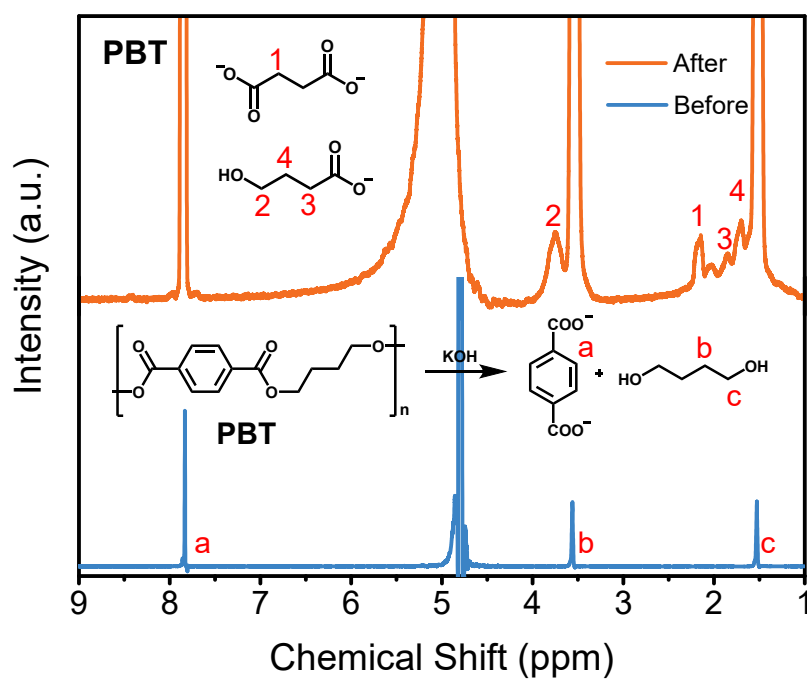

Fig. S20  $^1\text{H}$  NMR spectra of products before and after photoreforming of PBT.

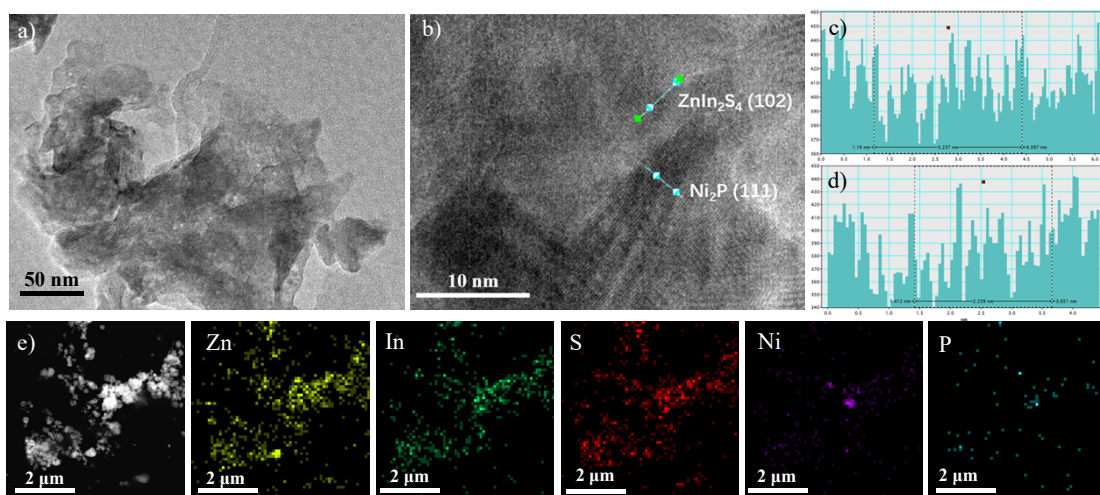

**Fig. S21** The morphology of the samples after a long-term photoreforming.

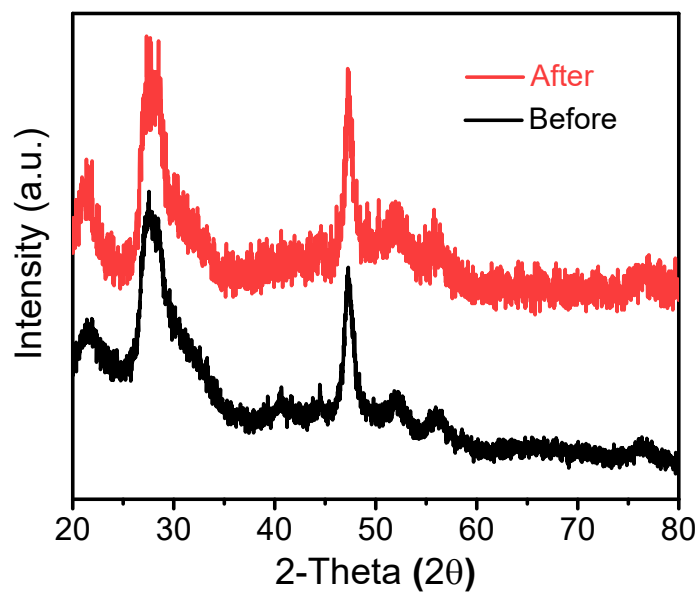

**Fig. S22** XRD of  $\text{Ni}_2\text{P}/\text{ZnIn}_2\text{S}_4$  before and after photocatalytic reaction.

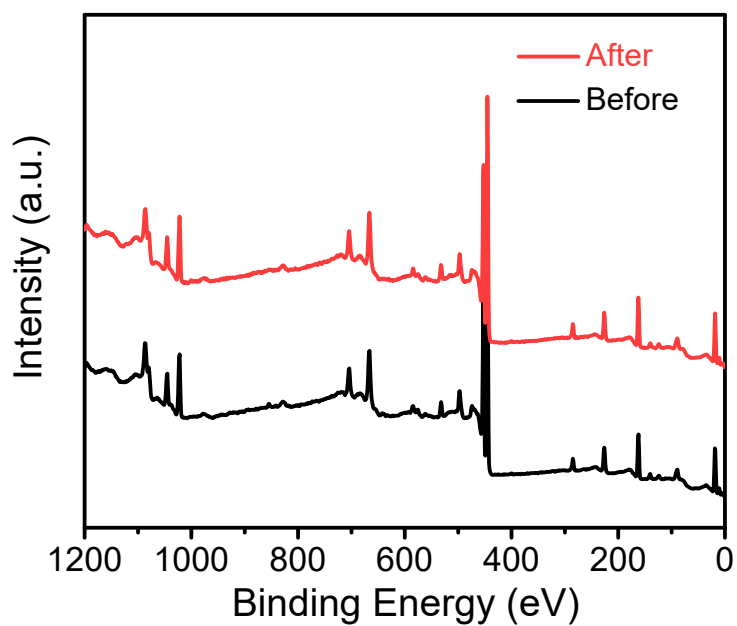

**Fig. S23** XPS of Ni<sub>2</sub>P/ZnIn<sub>2</sub>S<sub>4</sub> before and after photocatalytic reaction.

**Table S1.** EDX results of elements in the 7.5-Ni<sub>2</sub>P/ZnIn<sub>2</sub>S<sub>4</sub> composites.

| Element       | Weight% | Atomic% |
|---------------|---------|---------|
| <b>P K</b>    | 1.13    | 2.27    |
| <b>S K</b>    | 21.18   | 41.05   |
| <b>Ni K</b>   | 7.87    | 8.33    |
| <b>Zn K</b>   | 25.80   | 24.53   |
| <b>In L</b>   | 44.02   | 23.82   |
| <b>Totals</b> | 100.00  |         |

**Table S2.** ICP results of elements in the Ni<sub>2</sub>P/ZnIn<sub>2</sub>S<sub>4</sub> composites.

|                 | 1-Ni <sub>2</sub> P/ZnIn <sub>2</sub> S <sub>4</sub> | 3-Ni <sub>2</sub> P/ZnIn <sub>2</sub> S <sub>4</sub> | 5-Ni <sub>2</sub> P/ZnIn <sub>2</sub> S <sub>4</sub> |
|-----------------|------------------------------------------------------|------------------------------------------------------|------------------------------------------------------|
| <b>Zn (wt%)</b> | 13.471                                               | 13.818                                               | 13.985                                               |
| <b>In (wt%)</b> | 55.743                                               | 53.405                                               | 51.850                                               |
| <b>Ni (wt%)</b> | 0.800                                                | 1.803                                                | 3.591                                                |
